# Supplementary material for: Diagnostic limitations of clinical case definitions of pertussis in infants and children with severe lower respiratory tract infection
Source: PubMed Central journal article supplement (PMC7367487; doi:10.1371/journal.pone.0235703), 2020-07-17
Supplement: pone.0235703.s001.pdf [file pone.0235703.s001.pdf]

**Fig 1. Sensitivity and specificity of clinical features in the diagnosis of pertussis**

| <b>A: World Health Organization</b> |                         |                     |                     |
|-------------------------------------|-------------------------|---------------------|---------------------|
|                                     | <b>Clinical Feature</b> | <b>PCR +</b>        | <b>PCR -</b>        |
|                                     |                         | <b>n=13</b>         | <b>n =119</b>       |
|                                     |                         | <b>n; % (95 CI)</b> | <b>n; % (95 CI)</b> |
| <b>0 - 3 months</b>                 | Paroxysmal cough        | 8; 62% (34 - 83)    | 40; 34% (26 - 43)   |
|                                     | Whoop                   | 4; 31% (12 - 59)    | 82; 69% (60 - 77)   |
|                                     | Post-tussive vomit      | 7; 54% (28 - 78)    | 63; 53% (44 - 62)   |
|                                     | Any                     | 9; 69% (41 - 88)    | 23; 19% (13 - 27)   |
| <b>4 months - 9 years</b>           | Paroxysmal cough        | 15; 79% (55 - 92)   | 89; 29% (24 - 34)   |
|                                     | Whoop                   | 4; 76% (71 - 81)    | 234; 76% (71 - 81)  |
|                                     | Post-tussive vomit      | 5; 26% (11 - 50)    | 177; 58% (52 - 63)  |
|                                     | Any                     | 16; 84% (61 - 95)   | 43; 14% (11 - 18)   |

  

| <b>B: Global Pertussis Initiative</b> |                         |                     |                     |
|---------------------------------------|-------------------------|---------------------|---------------------|
|                                       | <b>Clinical Feature</b> | <b>PCR +</b>        | <b>PCR -</b>        |
|                                       |                         | <b>n=13</b>         | <b>n =119</b>       |
|                                       |                         | <b>n; % (95 CI)</b> | <b>n; % (95 CI)</b> |
| <b>0 - 3 months</b>                   | Whoop                   | 4; 31% (12 - 59)    | 86; 72% (63 - 80)   |
|                                       | Apnea                   | 2; 15% (4 - 45)     | 112; 94% (88 - 97)  |
|                                       | Post-tussive vomit      | 7; 54% (28 - 78)    | 70; 59% (50 - 67)   |
|                                       | Cyanosis                | 2; 15% (4 - 45)     | 117; 98% (93 - 100) |
|                                       | Any                     | 7; 54% (28 - 78)    | 57; 48% (39 - 57)   |
| <b>4 months - 9 years</b>             | Whoop                   | 2; 11% (3 - 34)     | 269; 88% (83 - 91)  |
|                                       | Apnea                   | 1; 5% (1 - 30)      | 301; 98% (96 - 99)  |
|                                       | Post-tussive vomit      | 3; 16% (5 - 39)     | 240; 78% (73 - 82)  |
|                                       | Cyanosis                | 1; 5% (1 - 30)      | 296; 96% (94 - 98)  |
|                                       | Any                     | 4; 21% (8 - 45)     | 219; 71% (66 - 76)  |

95% CI = 95% Confidence Interval

**A World Health Organization**

1. Detailed report of sensitivity and specificity for the whole group

| Cutpoint  | Sensitivity | Specificity | Correctly Classified | LR+    | LR-    |
|-----------|-------------|-------------|----------------------|--------|--------|
| ( >= 1 )  | 100.00%     | 0.00%       | 6.51%                | 1.0000 |        |
| ( >= 2 )  | 100.00%     | 5.57%       | 11.72%               | 1.0590 | 0.0000 |
| ( >= 3 )  | 72.00%      | 34.26%      | 36.72%               | 1.0953 | 0.8172 |
| ( >= 4 )  | 56.00%      | 57.38%      | 57.29%               | 1.3140 | 0.7668 |
| ( >= 5 )  | 40.00%      | 69.64%      | 67.71%               | 1.3174 | 0.8616 |
| ( >= 6 )  | 32.00%      | 79.11%      | 76.04%               | 1.5317 | 0.8596 |
| ( >= 7 )  | 32.00%      | 81.89%      | 78.65%               | 1.7674 | 0.8303 |
| ( >= 8 )  | 12.00%      | 92.76%      | 87.50%               | 1.6569 | 0.9487 |
| ( >= 9 )  | 12.00%      | 93.59%      | 88.28%               | 1.8730 | 0.9402 |
| ( >= 10 ) | 12.00%      | 93.87%      | 88.54%               | 1.9582 | 0.9374 |
| ( >= 14 ) | 12.00%      | 94.43%      | 89.06%               | 2.1540 | 0.9319 |

| Obs | ROC Area | Std. Err. | —Asymptotic Normal—<br>[95% Conf. Interval] |         |
|-----|----------|-----------|---------------------------------------------|---------|
| 384 | 0.5815   | 0.0599    | 0.46405                                     | 0.69896 |

2. Detailed report of sensitivity and specificity: 1 - 3 months old

| Cutpoint  | Sensitivity | Specificity | Correctly Classified | LR+    | LR-    |
|-----------|-------------|-------------|----------------------|--------|--------|
| ( >= 1 )  | 100.00%     | 0.00%       | 8.57%                | 1.0000 |        |
| ( >= 2 )  | 100.00%     | 4.17%       | 12.38%               | 1.0435 | 0.0000 |
| ( >= 3 )  | 88.89%      | 25.00%      | 30.48%               | 1.1852 | 0.4444 |
| ( >= 4 )  | 77.78%      | 52.08%      | 54.29%               | 1.6232 | 0.4267 |
| ( >= 5 )  | 66.67%      | 62.50%      | 62.86%               | 1.7778 | 0.5333 |
| ( >= 6 )  | 55.56%      | 75.00%      | 73.33%               | 2.2222 | 0.5926 |
| ( >= 7 )  | 55.56%      | 79.17%      | 77.14%               | 2.6667 | 0.5614 |
| ( >= 8 )  | 33.33%      | 92.71%      | 87.62%               | 4.5714 | 0.7191 |
| ( >= 14 ) | 33.33%      | 93.75%      | 88.57%               | 5.3333 | 0.7111 |

| Obs | ROC Area | Std. Err. | —Asymptotic Normal—<br>[95% Conf. Interval] |         |
|-----|----------|-----------|---------------------------------------------|---------|
| 105 | 0.7130   | 0.1005    | 0.51604                                     | 0.90989 |

3. Detailed report of sensitivity and specificity: 4 months to 9 years of age

| Cutpoint  | Sensitivity | Specificity | Correctly Classified | LR+    | LR-    |
|-----------|-------------|-------------|----------------------|--------|--------|
| ( >= 1 )  | 100.00%     | 0.00%       | 5.73%                | 1.0000 |        |
| ( >= 2 )  | 100.00%     | 6.08%       | 11.47%               | 1.0648 | 0.0000 |
| ( >= 3 )  | 62.50%      | 37.64%      | 39.07%               | 1.0023 | 0.9962 |
| ( >= 4 )  | 43.75%      | 59.32%      | 58.42%               | 1.0754 | 0.9483 |
| ( >= 5 )  | 25.00%      | 72.24%      | 69.53%               | 0.9007 | 1.0382 |
| ( >= 6 )  | 18.75%      | 80.61%      | 77.06%               | 0.9669 | 1.0080 |
| ( >= 7 )  | 18.75%      | 82.89%      | 79.21%               | 1.0958 | 0.9802 |
| ( >= 8 )  | 0.00%       | 92.78%      | 87.46%               | 0.0000 | 1.0779 |
| ( >= 9 )  | 0.00%       | 93.54%      | 88.17%               | 0.0000 | 1.0691 |
| ( >= 10 ) | 0.00%       | 93.92%      | 88.53%               | 0.0000 | 1.0648 |
| ( >= 14 ) | 0.00%       | 94.68%      | 89.25%               | 0.0000 | 1.0562 |

| Obs | ROC Area | Std. Err. | —Asymptotic Normal—<br>[95% Conf. Interval] |         |
|-----|----------|-----------|---------------------------------------------|---------|
| 279 | 0.5087   | 0.0687    | 0.37400                                     | 0.64335 |

**B .Global Pertussis Initiative**

1. Detailed report of sensitivity and specificity: whole group

| Cutpoint  | Sensitivity | Specificity | Correctly Classified | LR+    | LR-    |
|-----------|-------------|-------------|----------------------|--------|--------|
| ( >= 1 )  | 100.00%     | 0.00%       | 6.83%                | 1.0000 |        |
| ( >= 2 )  | 100.00%     | 2.67%       | 9.32%                | 1.0274 | 0.0000 |
| ( >= 3 )  | 90.91%      | 28.00%      | 32.30%               | 1.2626 | 0.3247 |
| ( >= 4 )  | 81.82%      | 50.00%      | 52.17%               | 1.6364 | 0.3636 |
| ( >= 5 )  | 72.73%      | 62.00%      | 62.73%               | 1.9139 | 0.4399 |
| ( >= 6 )  | 63.64%      | 72.67%      | 72.05%               | 2.3282 | 0.5004 |
| ( >= 7 )  | 63.64%      | 76.67%      | 75.78%               | 2.7273 | 0.4743 |
| ( >= 8 )  | 27.27%      | 87.33%      | 83.23%               | 2.1531 | 0.8328 |
| ( >= 9 )  | 27.27%      | 88.67%      | 84.47%               | 2.4064 | 0.8202 |
| ( >= 10 ) | 27.27%      | 89.33%      | 85.09%               | 2.5568 | 0.8141 |
| ( >= 14 ) | 27.27%      | 90.67%      | 86.34%               | 2.9221 | 0.8021 |

| Obs | ROC Area | Std. Err. | —Asymptotic Normal—<br>[95% Conf. Interval] |         |
|-----|----------|-----------|---------------------------------------------|---------|
| 161 | 0.7197   | 0.0804    | 0.56214                                     | 0.87725 |

2. Detailed report of sensitivity and specificity: 1 - 3 months

| Cutpoint  | Sensitivity | Specificity | Correctly Classified | LR+    | LR-    |
|-----------|-------------|-------------|----------------------|--------|--------|
| ( >= 1 )  | 100.00%     | 0.00%       | 10.14%               | 1.0000 |        |
| ( >= 2 )  | 100.00%     | 1.61%       | 11.59%               | 1.0164 | 0.0000 |
| ( >= 3 )  | 85.71%      | 11.29%      | 18.84%               | 0.9662 | 1.2653 |
| ( >= 4 )  | 85.71%      | 38.71%      | 43.48%               | 1.3985 | 0.3690 |
| ( >= 5 )  | 85.71%      | 53.23%      | 56.52%               | 1.8325 | 0.2684 |
| ( >= 6 )  | 71.43%      | 72.58%      | 72.46%               | 2.6050 | 0.3937 |
| ( >= 7 )  | 71.43%      | 77.42%      | 76.81%               | 3.1633 | 0.3690 |
| ( >= 8 )  | 42.86%      | 88.71%      | 84.06%               | 3.7959 | 0.6442 |
| ( >= 14 ) | 42.86%      | 90.32%      | 85.51%               | 4.4286 | 0.6327 |

| Obs | ROC Area | Std. Err. | —Asymptotic Normal—<br>[95% Conf. Interval] |         |
|-----|----------|-----------|---------------------------------------------|---------|
| 69  | 0.7442   | 0.1242    | 0.50073                                     | 0.98775 |

3. Detailed report of sensitivity and specificity: 4 months to 9 years

| Cutpoint  | Sensitivity | Specificity | Correctly Classified | LR+    | LR-    |
|-----------|-------------|-------------|----------------------|--------|--------|
| ( >= 1 )  | 100.00%     | 0.00%       | 4.35%                | 1.0000 |        |
| ( >= 2 )  | 100.00%     | 3.41%       | 7.61%                | 1.0353 | 0.0000 |
| ( >= 3 )  | 100.00%     | 39.77%      | 42.39%               | 1.6604 | 0.0000 |
| ( >= 4 )  | 75.00%      | 57.95%      | 58.70%               | 1.7838 | 0.4314 |
| ( >= 5 )  | 50.00%      | 68.18%      | 67.39%               | 1.5714 | 0.7333 |
| ( >= 6 )  | 50.00%      | 72.73%      | 71.74%               | 1.8333 | 0.6875 |
| ( >= 7 )  | 50.00%      | 76.14%      | 75.00%               | 2.0952 | 0.6567 |
| ( >= 8 )  | 0.00%       | 86.36%      | 82.61%               | 0.0000 | 1.1579 |
| ( >= 9 )  | 0.00%       | 87.50%      | 83.70%               | 0.0000 | 1.1429 |
| ( >= 10 ) | 0.00%       | 88.64%      | 84.78%               | 0.0000 | 1.1282 |
| ( >= 14 ) | 0.00%       | 90.91%      | 86.96%               | 0.0000 | 1.1000 |

| Obs | ROC Area | Std. Err. | —Asymptotic Normal—<br>[95% Conf. Interval] |         |
|-----|----------|-----------|---------------------------------------------|---------|
| 92  | 0.6861   | 0.0877    | 0.51420                                     | 0.85796 |

**Fig 4. Sensitivity and specificity of lymphocytosis in the diagnosis of pertussis with and without World Health Organization and Global Pertussis Initiative criteria**

|                           |                               | PCR +                        | PCR -                            |
|---------------------------|-------------------------------|------------------------------|----------------------------------|
|                           |                               | n/n; % (95 CI)               | n/n; % (95 CI)                   |
| <b>0 - 3 months</b>       | Lymphocytosis alone           | n=13<br>4/13; 31% (12 - 59)  | n =119<br>90/119; 76% (67 - 83)  |
|                           | + World Health Organization   | 4/9; 44% (17 - 75)           | 18/23; 78% (56 - 91)             |
|                           | + Global Pertussis Initiative | 4/7; 57% (23 - 86)           | 44/57; 77% (64 - 86)             |
| <b>4 months - 9 years</b> | Lymphocytosis alone           | n=19<br>6/19; 32% (15 - 55)  | n =307<br>211/307; 69% (63 - 74) |
|                           | + World Health Organization   | 5/16; 31% (14 - 57)          | 32/43; 74% (59 - 85)             |
|                           | + Global Pertussis Initiative | 1/4; 25% (3 - 77)            | 153/219; 70% (63 - 76)           |
| <b>Whole group (all)</b>  | Lymphocytosis alone           | n=32<br>10/32; 31% (18 - 49) | n =426<br>301/426; 71% (66 - 75) |
|                           | + World Health Organization   | 9/25; 36% (20 - 56)          | 50/66; 76% (64 - 85)             |
|                           | + Global Pertussis Initiative | 5/11; 45% (20 - 73)          | 197/276; 71% (66 - 76)           |

95% CI = 95% Confidence Interval
